# Supplementary material for: RIM-DB: a taxonomic framework for community structure analysis of methanogenic archaea from the rumen and other intestinal environments
Source: PeerJ. 2014 Aug 5;2:e494. doi: 10.7717/peerj.494 (PMC4137658; doi:10.7717/peerj.494)
Supplement: Table S2 — Shown are the taxonomic assignments of (A) long length isolate sequences and (B) of V6–V8 region sequences obtained using the three different databases. [file peerj-02-494-s004.xls]

## Sheet: Sheet1
Taxonomic assignments of 16S rRNA gene sequences from isolates made using RIM-DB, SILVA, and Greengenes databases.
Shown are the taxonomic assignments of (A) long length isolate sequences and (B) of V6-V8 region sequences obtained using the three different databases.
A.Taxonomic assignment of full length sequences
Accession	Name	RIM-DB assignment	SILVA assignment	Greengenes assignment
AJ002476	Methanosarcina barkeri strain CM1	k__Archaea;p__Euryarchaeota;c__Methanomicrobia;o__Methanosarcinales;f__Methanosarcinaceae;g__Methanosarcina;s__Methanosarcina barkeri;i__Methanosarcina barkeri strain CM1	Archaea; __Euryarchaeota; __Methanomicrobia; __Methanosarcinales; __Methanosarcinaceae; __Methanosarcina; __Methanosarcina_barkeri	k__Archaea; p__Euryarchaeota; c__Methanomicrobia; o__Methanosarcinales; f__Methanosarcinaceae; g__Methanosarcina; s__
AJ009958	Methanobrevibacter sp. SM9	k__Archaea;p__Euryarchaeota;c__Methanobacteria;o__Methanobacteriales;f__Methanobacteriaceae;g__Methanobrevibacter;s__Methanobrevibacter gottschalkii;i__Methanobrevibacter sp. SM9	Archaea; __Euryarchaeota; __Methanobacteria; __Methanobacteriales; __Methanobacteriaceae; __Methanobrevibacter; __Methanobrevibacter_sp.	k__Archaea; p__Euryarchaeota; c__Methanobacteria; o__Methanobacteriales; f__Methanobacteriaceae; g__Methanobrevibacter; s__
AJ550156	Methanobrevibacter sp. ABM4	k__Archaea;p__Euryarchaeota;c__Methanobacteria;o__Methanobacteriales;f__Methanobacteriaceae;g__Methanobrevibacter;s__Methanobrevibacter boviskoreani;i__Methanobrevibacter sp. ABM4	Archaea; __Euryarchaeota; __Methanobacteria; __Methanobacteriales; __Methanobacteriaceae; __Methanobrevibacter; __Methanobrevibacter_sp._AbM4	k__Archaea; p__Euryarchaeota; c__Methanobacteria; o__Methanobacteriales; f__Methanobacteriaceae; g__Methanobrevibacter; s__
AY196666	Methanobrevibacter ruminantium strain M1	k__Archaea;p__Euryarchaeota;c__Methanobacteria;o__Methanobacteriales;f__Methanobacteriaceae;g__Methanobrevibacter;s__Methanobrevibacter ruminantium clade;i__Methanobrevibacter ruminantium strain M1	Archaea; __Euryarchaeota; __Methanobacteria; __Methanobacteriales; __Methanobacteriaceae; __Methanobrevibacter; __uncultured_archaeon	k__Archaea; p__Euryarchaeota; c__Methanobacteria; o__Methanobacteriales; f__Methanobacteriaceae; g__Methanobrevibacter; s__
AY196679	Methanomicrobium mobile strain BP	k__Archaea;p__Euryarchaeota;c__Methanomicrobia;o__Methanomicrobiales;f__Methanomicrobiaceae;g__Methanomicrobium;s__Methanomicrobium mobile;i__Methanomicrobium mobile strain BP	Archaea; __Euryarchaeota; __Methanomicrobia; __Methanomicrobiales; __Methanomicrobiaceae; __Methanomicrobium; __uncultured_euryarchaeote	k__Archaea; p__Euryarchaeota; c__Methanomicrobia; o__Methanomicrobiales; f__Methanomicrobiaceae; g__Methanoplanus; s__
AY196680	Methanimicrococcus blatticola strain PA	k__Archaea;p__Euryarchaeota;c__Methanomicrobia;o__Methanosarcinales;f__Methanosarcinaceae;g__Methanimicrococcus;s__Methanimicrococcus blatticola;i__Methanimicrococcus blatticola strain PA	Archaea; __Euryarchaeota; __Methanomicrobia; __Methanosarcinales; __Methanosarcinaceae; __Methanimicrococcus; __Methanimicrococcus_blatticola	k__Archaea; p__Euryarchaeota; c__Methanomicrobia; o__Methanosarcinales; f__Methanosarcinaceae; g__Methanimicrococcus; s__blatticola
AY615201	Methanobrevibacter olleyae strain KM1H5-1P	k__Archaea;p__Euryarchaeota;c__Methanobacteria;o__Methanobacteriales;f__Methanobacteriaceae;g__Methanobrevibacter;s__Methanobrevibacter ruminantium clade;i__Methanobrevibacter olleyae strain KM1H5-1P	Archaea; __Euryarchaeota; __Methanobacteria; __Methanobacteriales; __Methanobacteriaceae; __Methanobrevibacter; __Methanobrevibacter_olleyae	k__Archaea; p__Euryarchaeota; c__Methanobacteria; o__Methanobacteriales; f__Methanobacteriaceae; g__Methanobrevibacter; s__
BAGX01000593	Methanobrevibacter boviskoreani sp. JH1	k__Archaea;p__Euryarchaeota;c__Methanobacteria;o__Methanobacteriales;f__Methanobacteriaceae;g__Methanobrevibacter;s__Methanobrevibacter boviskoreani;i__Methanobrevibacter boviskoreani strain JH1	Archaea; __Euryarchaeota; __Methanobacteria; __Methanobacteriales; __Methanobacteriaceae; __Methanobrevibacter; __Methanobrevibacter_sp._AbM4	k__Archaea; p__Euryarchaeota; c__Methanobacteria; o__Methanobacteriales; f__Methanobacteriaceae; g__Methanobrevibacter; s__
CP000102	Methanosphaera stadtmanae MCB-3	k__Archaea;p__Euryarchaeota;c__Methanobacteria;o__Methanobacteriales;f__Methanobacteriaceae;g__Methanosphaera;s__Methanosphaera stadtmanae;i__Methanosphaera stadtmanae strain MCB-3	Archaea; __Euryarchaeota; __Methanobacteria; __Methanobacteriales; __Methanobacteriaceae; __Methanosphaera; __Methanosphaera_stadtmanae_DSM_3091	k__Archaea; p__Euryarchaeota; c__Methanobacteria; o__Methanobacteriales; f__Methanobacteriaceae; g__Methanosphaera; s__
CP000559	Methanocorpusculum labreanum Z	k__Archaea;p__Euryarchaeota;c__Methanomicrobia;o__Methanomicrobiales;f__Methanocorpusculaceae;g__Methanocorpusculum;s__Methanocorpusculum labreanum;i__Methanocorpusculum labreanum strain Z	Archaea; __Euryarchaeota; __Methanomicrobia; __Methanomicrobiales; __Methanocorpusculaceae; __Methanocorpusculum; __Methanocorpusculum_labreanum_Z	k__Archaea; p__Euryarchaeota; c__Methanomicrobia; o__Methanomicrobiales; f__Methanocorpusculaceae; g__Methanocorpusculum; s__
HE582783	Methanosphaera cuniculi 1R-7	k__Archaea;p__Euryarchaeota;c__Methanobacteria;o__Methanobacteriales;f__Methanobacteriaceae;g__Methanosphaera;s__Methanosphaera cuniculi;i__Methanosphaera cuniculi strain 1R-7	Archaea; __Euryarchaeota; __Methanobacteria; __Methanobacteriales; __Methanobacteriaceae; __Methanosphaera; __Methanosphaera_cuniculi	k__Archaea; p__Euryarchaeota; c__Methanobacteria; o__Methanobacteriales; f__Methanobacteriaceae; g__Methanosphaera; s__
HE654003	Methanobrevibacter oralis DSM7256	k__Archaea;p__Euryarchaeota;c__Methanobacteria;o__Methanobacteriales;f__Methanobacteriaceae;g__Methanobrevibacter;s__Methanobrevibacter oralis;i__Methanobrevibacter oralis strain DSM7256	Archaea; __Euryarchaeota; __Methanobacteria; __Methanobacteriales; __Methanobacteriaceae; __Methanobrevibacter; __Methanobrevibacter_smithii_ATCC_35061	k__Archaea; p__Euryarchaeota; c__Methanobacteria; o__Methanobacteriales; f__Methanobacteriaceae; g__Methanobrevibacter; s__
HQ896499	Methanomassiliicoccus luminyensis strain B10	k__Archaea;p__Euryarchaeota;c__Thermoplasmata;o__Methanoplasmatales;f__Methanomassiliicoccaceae;g__Methanomassiliicoccus;s__Methanomassiliicoccus luminyensis;i__Methanomassiliicoccus luminyensis strain B10	Archaea; __Euryarchaeota; __Thermoplasmata; __Thermoplasmatales; __Methanomassiliicoccus; __Methanomassiliicoccus_luminyensis	k__Archaea; p__Euryarchaeota; c__Thermoplasmata; o__E2; f__[Methanomassiliicoccaceae]; g__Methanomassiliicoccus; s__
JQ346750	Methanobrevibacter smithii ATCC 35061 strain PS	k__Archaea;p__Euryarchaeota;c__Methanobacteria;o__Methanobacteriales;f__Methanobacteriaceae;g__Methanobrevibacter;s__Methanobrevibacter smithii;i__Methanobrevibacter smithii strain PS	Archaea; __Euryarchaeota; __Methanobacteria; __Methanobacteriales; __Methanobacteriaceae; __Methanobrevibacter; __Methanobrevibacter_smithii_ATCC_35061	k__Archaea; p__Euryarchaeota; c__Methanobacteria; o__Methanobacteriales; f__Methanobacteriaceae; g__Methanobrevibacter; s__
KF697728	Methanosphaera sp. isolate A4	k__Archaea;p__Euryarchaeota;c__Methanobacteria;o__Methanobacteriales;f__Methanobacteriaceae;g__Methanosphaera;s__Methanosphaera sp. A4;i__Methanosphaera sp. A4	Archaea; __Euryarchaeota; __Methanobacteria; __Methanobacteriales; __Methanobacteriaceae; __Methanosphaera; __uncultured_Methanosphaera_sp.	k__Archaea; p__Euryarchaeota; c__Methanobacteria; o__Methanobacteriales; f__Methanobacteriaceae; g__Methanosphaera; s__
KF697734	Methanosphaera sp. isolate ISO3-F5	k__Archaea;p__Euryarchaeota;c__Methanobacteria;o__Methanobacteriales;f__Methanobacteriaceae;g__Methanosphaera;s__Methanosphaera sp. ISO3-F5;i__Methanosphaera sp. ISO3-F5	Archaea; __Euryarchaeota; __Methanobacteria; __Methanobacteriales; __Methanobacteriaceae; __Methanosphaera; __uncultured_methanogenic_archaeon	k__Archaea; p__Euryarchaeota; c__Methanobacteria; o__Methanobacteriales; f__Methanobacteriaceae; g__Methanosphaera; s__
U41095	Methanobrevibacter cuticularis strain RFM-1	k__Archaea;p__Euryarchaeota;c__Methanobacteria;o__Methanobacteriales;f__Methanobacteriaceae;g__Methanobrevibacter;s__Methanobrevibacter cuticularis;i__Methanobrevibacter cuticularis strain RFM-1	Archaea; __Euryarchaeota; __Methanobacteria; __Methanobacteriales; __Methanobacteriaceae; __Methanobrevibacter; __Methanobrevibacter_cuticularis	k__Archaea; p__Euryarchaeota; c__Methanobacteria; o__Methanobacteriales; f__Methanobacteriaceae; g__Methanobrevibacter; s__
U55234	Methanobrevibacter smithii strain ALI	k__Archaea;p__Euryarchaeota;c__Methanobacteria;o__Methanobacteriales;f__Methanobacteriaceae;g__Methanobrevibacter;s__Methanobrevibacter smithii;i__Methanobrevibacter smithii strain ALI	Archaea; __Euryarchaeota; __Methanobacteria; __Methanobacteriales; __Methanobacteriaceae; __Methanobrevibacter; __Methanobrevibacter_smithii	k__Archaea; p__Euryarchaeota; c__Methanobacteria; o__Methanobacteriales; f__Methanobacteriaceae; g__Methanobrevibacter; s__
U55237	Methanobrevibacter woesei strain GS	k__Archaea;p__Euryarchaeota;c__Methanobacteria;o__Methanobacteriales;f__Methanobacteriaceae;g__Methanobrevibacter;s__Methanobrevibacter woesei;i__Methanobrevibacter woesei strain GS	Archaea; __Euryarchaeota; __Methanobacteria; __Methanobacteriales; __Methanobacteriaceae; __Methanobrevibacter; __Methanobrevibacter_woesei	k__Archaea; p__Euryarchaeota; c__Methanobacteria; o__Methanobacteriales; f__Methanobacteriaceae; g__Methanobrevibacter; s__
U55238	Methanobrevibacter gottschalkii strain HO	k__Archaea;p__Euryarchaeota;c__Methanobacteria;o__Methanobacteriales;f__Methanobacteriaceae;g__Methanobrevibacter;s__Methanobrevibacter gottschalkii;i__Methanobrevibacter gottschalkii strain HO	Archaea; __Euryarchaeota; __Methanobacteria; __Methanobacteriales; __Methanobacteriaceae; __Methanobrevibacter; __Methanobrevibacter_gottschalkii	k__Archaea; p__Euryarchaeota; c__Methanobacteria; o__Methanobacteriales; f__Methanobacteriaceae; g__Methanobrevibacter; s__
U55239	Methanobrevibacter gottschalkii strain PG	k__Archaea;p__Euryarchaeota;c__Methanobacteria;o__Methanobacteriales;f__Methanobacteriaceae;g__Methanobrevibacter;s__Methanobrevibacter gottschalkii;i__Methanobrevibacter gottschalkii strain PG	Archaea; __Euryarchaeota; __Methanobacteria; __Methanobacteriales; __Methanobacteriaceae; __Methanobrevibacter; __Methanobrevibacter_gottschalkii	k__Archaea; p__Euryarchaeota; c__Methanobacteria; o__Methanobacteriales; f__Methanobacteriaceae; g__Methanobrevibacter; s__
U55240	Methanobrevibacter wolinii strain SH	k__Archaea;p__Euryarchaeota;c__Methanobacteria;o__Methanobacteriales;f__Methanobacteriaceae;g__Methanobrevibacter;s__Methanobrevibacter wolinii;i__Methanobrevibacter wolinii SH	Archaea; __Euryarchaeota; __Methanobacteria; __Methanobacteriales; __Methanobacteriaceae; __Methanobrevibacter; __Methanobrevibacter_wolinii	k__Archaea; p__Euryarchaeota; c__Methanobacteria; o__Methanobacteriales; f__Methanobacteriaceae; g__Methanobrevibacter; s__
U62533	Methanobrevibacter curvatus strain RFM-2	k__Archaea;p__Euryarchaeota;c__Methanobacteria;o__Methanobacteriales;f__Methanobacteriaceae;g__Methanobrevibacter;s__Methanobrevibacter curvatus;i__Methanobrevibacter curvatus strain RFM-2	Archaea; __Euryarchaeota; __Methanobacteria; __Methanobacteriales; __Methanobacteriaceae; __Methanobrevibacter; __Methanobrevibacter_curvatus	k__Archaea; p__Euryarchaeota; c__Methanobacteria; o__Methanobacteriales; f__Methanobacteriaceae; g__Methanobrevibacter; s__
U82322	Methanobrevibacter filiformis strain RFM-3	k__Archaea;p__Euryarchaeota;c__Methanobacteria;o__Methanobacteriales;f__Methanobacteriaceae;g__Methanobrevibacter;s__Methanobrevibacter filiformis;i__Methanobrevibacter filiformis strain RFM-3	Archaea; __Euryarchaeota; __Methanobacteria; __Methanobacteriales; __Methanobacteriaceae; __Methanobrevibacter; __Methanobrevibacter_filiformis	k__Archaea; p__Euryarchaeota; c__Methanobacteria; o__Methanobacteriales; f__Methanobacteriaceae; g__Methanobrevibacter; s__arboriphilus
B.Taxonomic assignment of V6-V8 region sequences
Accession	Name	RIM-DB assignment	SILVA assignment	Greengenes assignment
AJ002476	Methanosarcina barkeri strain CM1	k__Archaea;p__Euryarchaeota;c__Methanomicrobia;o__Methanosarcinales;f__Methanosarcinaceae;g__Methanosarcina;s__Methanosarcina sp. AL10;i__Methanosarcina sp. AL10	Archaea; __Euryarchaeota; __Methanomicrobia; __Methanosarcinales; __Methanosarcinaceae; __Methanosarcina; __Methanosarcina_barkeri	k__Archaea; p__Euryarchaeota; c__Methanomicrobia; o__Methanosarcinales; f__Methanosarcinaceae; g__Methanosarcina; s__
AJ009958	Methanobrevibacter sp. SM9	k__Archaea;p__Euryarchaeota;c__Methanobacteria;o__Methanobacteriales;f__Methanobacteriaceae;g__Methanobrevibacter;s__Methanobrevibacter gottschalkii;i__none	Archaea; __Euryarchaeota; __Methanobacteria; __Methanobacteriales; __Methanobacteriaceae; __Methanobrevibacter; __uncultured_archaeon	k__Archaea; p__Euryarchaeota; c__Methanobacteria; o__Methanobacteriales; f__Methanobacteriaceae; g__Methanobrevibacter; s__
AJ550156	Methanobrevibacter sp. ABM4	k__Archaea;p__Euryarchaeota;c__Methanobacteria;o__Methanobacteriales;f__Methanobacteriaceae;g__Methanobrevibacter;s__Methanobrevibacter boviskoreani;i__Methanobrevibacter boviskoreani strain JH1	Archaea; __Euryarchaeota; __Methanobacteria; __Methanobacteriales; __Methanobacteriaceae; __Methanobrevibacter; __Methanobrevibacter_sp._AbM4	k__Archaea; p__Euryarchaeota; c__Methanobacteria; o__Methanobacteriales; f__Methanobacteriaceae; g__Methanobrevibacter; s__
AY196666	Methanobrevibacter ruminantium strain M1	k__Archaea;p__Euryarchaeota;c__Methanobacteria;o__Methanobacteriales;f__Methanobacteriaceae;g__Methanobrevibacter;s__Methanobrevibacter ruminantium clade;i__none	Archaea; __Euryarchaeota; __Methanobacteria; __Methanobacteriales; __Methanobacteriaceae; __Methanobrevibacter; __uncultured_Methanobrevibacter_sp.	k__Archaea; p__Euryarchaeota; c__Methanobacteria; o__Methanobacteriales; f__Methanobacteriaceae; g__Methanobrevibacter; s__
AY196679	Methanomicrobium mobile strain BP	k__Archaea;p__Euryarchaeota;c__Methanomicrobia;o__Methanomicrobiales;f__Methanomicrobiaceae;g__Methanomicrobium;s__Methanomicrobium mobile;i__Methanomicrobium mobile strain BP	Archaea; __Euryarchaeota; __Methanomicrobia; __Methanomicrobiales; __Methanomicrobiaceae; __Methanomicrobium; __Methanomicrobium_mobile	k__Archaea; p__Euryarchaeota; c__Methanomicrobia; o__Methanomicrobiales; f__Methanomicrobiaceae; g__Methanoplanus; s__
AY196680	Methanimicrococcus blatticola strain PA	k__Archaea;p__Euryarchaeota;c__Methanomicrobia;o__Methanosarcinales;f__Methanosarcinaceae;g__Methanimicrococcus;s__Methanimicrococcus blatticola;i__Methanimicrococcus blatticola strain PA	Archaea; __Euryarchaeota; __Methanomicrobia; __Methanosarcinales; __Methanosarcinaceae; __Methanimicrococcus; __Methanimicrococcus_blatticola	k__Archaea; p__Euryarchaeota; c__Methanomicrobia; o__Methanosarcinales; f__Methanosarcinaceae; g__Methanimicrococcus; s__blatticola
AY615201	Methanobrevibacter olleyae strain KM1H5-1P	k__Archaea;p__Euryarchaeota;c__Methanobacteria;o__Methanobacteriales;f__Methanobacteriaceae;g__Methanobrevibacter;s__Methanobrevibacter ruminantium clade;i__Methanobrevibacter olleyae strain KM1H5-1P	Archaea; __Euryarchaeota; __Methanobacteria; __Methanobacteriales; __Methanobacteriaceae; __Methanobrevibacter; __Methanobrevibacter_olleyae	k__Archaea; p__Euryarchaeota; c__Methanobacteria; o__Methanobacteriales; f__Methanobacteriaceae; g__Methanobrevibacter; s__
BAGX01000593	Methanobrevibacter boviskoreani sp. JH1	k__Archaea;p__Euryarchaeota;c__Methanobacteria;o__Methanobacteriales;f__Methanobacteriaceae;g__Methanobrevibacter;s__Methanobrevibacter boviskoreani;i__Methanobrevibacter boviskoreani strain JH1	Archaea; __Euryarchaeota; __Methanobacteria; __Methanobacteriales; __Methanobacteriaceae; __Methanobrevibacter; __Methanobrevibacter_sp._AbM4	k__Archaea; p__Euryarchaeota; c__Methanobacteria; o__Methanobacteriales; f__Methanobacteriaceae; g__Methanobrevibacter; s__
CP000102	Methanosphaera stadtmanae MCB-3	k__Archaea;p__Euryarchaeota;c__Methanobacteria;o__Methanobacteriales;f__Methanobacteriaceae;g__Methanosphaera;s__Methanosphaera stadtmanae;i__Methanosphaera stadtmanae strain MCB-3	Archaea; __Euryarchaeota; __Methanobacteria; __Methanobacteriales; __Methanobacteriaceae; __Methanosphaera; __Methanosphaera_stadtmanae_DSM_3091	k__Archaea; p__Euryarchaeota; c__Methanobacteria; o__Methanobacteriales; f__Methanobacteriaceae; g__Methanosphaera; s__
CP000559	Methanocorpusculum labreanum Z	k__Archaea;p__Euryarchaeota;c__Methanomicrobia;o__Methanomicrobiales;f__Methanocorpusculaceae;g__Methanocorpusculum;s__Methanocorpusculum sinense;i__Methanocorpusculum sinense strain DSM4274	Archaea; __Euryarchaeota; __Methanomicrobia; __Methanomicrobiales; __Methanocorpusculaceae; __Methanocorpusculum; __Methanocorpusculum_sinense	k__Archaea; p__Euryarchaeota; c__Methanomicrobia; o__Methanomicrobiales; f__Methanocorpusculaceae; g__Methanocorpusculum; s__
HE582783	Methanosphaera cuniculi 1R-7	k__Archaea;p__Euryarchaeota;c__Methanobacteria;o__Methanobacteriales;f__Methanobacteriaceae;g__Methanosphaera;s__Methanosphaera cuniculi;i__Methanosphaera cuniculi strain 1R-7	Archaea; __Euryarchaeota; __Methanobacteria; __Methanobacteriales; __Methanobacteriaceae; __Methanosphaera; __Methanosphaera_cuniculi	k__Archaea; p__Euryarchaeota; c__Methanobacteria; o__Methanobacteriales; f__Methanobacteriaceae; g__Methanosphaera; s__
HE654003	Methanobrevibacter oralis DSM7256	k__Archaea;p__Euryarchaeota;c__Methanobacteria;o__Methanobacteriales;f__Methanobacteriaceae;g__Methanobrevibacter;s__Methanobrevibacter oralis;i__Methanobrevibacter oralis strain DSM7256	Archaea; __Euryarchaeota; __Methanobacteria; __Methanobacteriales; __Methanobacteriaceae; __Methanobrevibacter; __uncultured_archaeon	k__Archaea; p__Euryarchaeota; c__Methanobacteria; o__Methanobacteriales; f__Methanobacteriaceae; g__Methanobrevibacter; s__
HQ896499	Methanomassiliicoccus luminyensis strain B10	k__Archaea;p__Euryarchaeota;c__Thermoplasmata;o__Methanoplasmatales;f__Methanomassiliicoccaceae;g__Methanomassiliicoccus;s__Methanomassiliicoccus luminyensis;i__Methanomassiliicoccus luminyensis strain B10	Archaea; __Euryarchaeota; __Thermoplasmata; __Thermoplasmatales; __Methanomassiliicoccus; __Methanomassiliicoccus_luminyensis	k__Archaea; p__Euryarchaeota; c__Thermoplasmata; o__E2; f__[Methanomassiliicoccaceae]; g__Methanomassiliicoccus; s__
JQ346750	Methanobrevibacter smithii ATCC 35061 strain PS	k__Archaea;p__Euryarchaeota;c__Methanobacteria;o__Methanobacteriales;f__Methanobacteriaceae;g__Methanobrevibacter;s__Methanobrevibacter smithii;i__Methanobrevibacter smithii strain PS	Archaea; __Euryarchaeota; __Methanobacteria; __Methanobacteriales; __Methanobacteriaceae; __Methanobrevibacter; __Methanobrevibacter_smithii_ATCC_35061	k__Archaea; p__Euryarchaeota; c__Methanobacteria; o__Methanobacteriales; f__Methanobacteriaceae; g__Methanobrevibacter; s__
KF697728	Methanosphaera sp. isolate A4	k__Archaea;p__Euryarchaeota;c__Methanobacteria;o__Methanobacteriales;f__Methanobacteriaceae;g__Methanosphaera;s__Methanosphaera sp. A4;i__Methanosphaera sp. A4	Archaea; __Euryarchaeota; __Methanobacteria; __Methanobacteriales; __Methanobacteriaceae; __Methanosphaera; __Methanosphaera_stadtmanae_DSM_3091	k__Archaea; p__Euryarchaeota; c__Methanobacteria; o__Methanobacteriales; f__Methanobacteriaceae; g__Methanosphaera; s__
KF697734	Methanosphaera sp. isolate ISO3-F5	k__Archaea;p__Euryarchaeota;c__Methanobacteria;o__Methanobacteriales;f__Methanobacteriaceae;g__Methanosphaera;s__Methanosphaera sp. ISO3-F5;i__Methanosphaera sp. ISO3-F5	Archaea; __Euryarchaeota; __Methanobacteria; __Methanobacteriales; __Methanobacteriaceae; __Methanosphaera; __uncultured_archaeon	k__Archaea; p__Euryarchaeota; c__Methanobacteria; o__Methanobacteriales; f__Methanobacteriaceae; g__Methanosphaera; s__
U41095	Methanobrevibacter cuticularis strain RFM-1	k__Archaea;p__Euryarchaeota;c__Methanobacteria;o__Methanobacteriales;f__Methanobacteriaceae;g__Methanobrevibacter;s__Methanobrevibacter cuticularis;i__Methanobrevibacter cuticularis strain RFM-1	Archaea; __Euryarchaeota; __Methanobacteria; __Methanobacteriales; __Methanobacteriaceae; __Methanobrevibacter; __Methanobrevibacter_cuticularis	k__Archaea; p__Euryarchaeota; c__Methanobacteria; o__Methanobacteriales; f__Methanobacteriaceae; g__Methanobrevibacter; s__
U55234	Methanobrevibacter smithii strain ALI	k__Archaea;p__Euryarchaeota;c__Methanobacteria;o__Methanobacteriales;f__Methanobacteriaceae;g__Methanobrevibacter;s__Methanobrevibacter smithii;i__Methanobrevibacter smithii strain ALI	Archaea; __Euryarchaeota; __Methanobacteria; __Methanobacteriales; __Methanobacteriaceae; __Methanobrevibacter; __Methanobrevibacter_smithii	k__Archaea; p__Euryarchaeota; c__Methanobacteria; o__Methanobacteriales; f__Methanobacteriaceae; g__Methanobrevibacter; s__
U55237	Methanobrevibacter woesei strain GS	k__Archaea;p__Euryarchaeota;c__Methanobacteria;o__Methanobacteriales;f__Methanobacteriaceae;g__Methanobrevibacter;s__Methanobrevibacter woesei;i__Methanobrevibacter woesei strain GS	Archaea; __Euryarchaeota; __Methanobacteria; __Methanobacteriales; __Methanobacteriaceae; __Methanobrevibacter; __Methanobrevibacter_woesei	k__Archaea; p__Euryarchaeota; c__Methanobacteria; o__Methanobacteriales; f__Methanobacteriaceae; g__Methanobrevibacter; s__
U55238	Methanobrevibacter gottschalkii strain HO	k__Archaea;p__Euryarchaeota;c__Methanobacteria;o__Methanobacteriales;f__Methanobacteriaceae;g__Methanobrevibacter;s__Methanobrevibacter gottschalkii;i__Methanobrevibacter gottschalkii strain HO	Archaea; __Euryarchaeota; __Methanobacteria; __Methanobacteriales; __Methanobacteriaceae; __Methanobrevibacter; __Methanobrevibacter_gottschalkii	k__Archaea; p__Euryarchaeota; c__Methanobacteria; o__Methanobacteriales; f__Methanobacteriaceae; g__Methanobrevibacter; s__
U55239	Methanobrevibacter gottschalkii strain PG	k__Archaea;p__Euryarchaeota;c__Methanobacteria;o__Methanobacteriales;f__Methanobacteriaceae;g__Methanobrevibacter;s__Methanobrevibacter gottschalkii;i__Methanobrevibacter gottschalkii strain PG	Archaea; __Euryarchaeota; __Methanobacteria; __Methanobacteriales; __Methanobacteriaceae; __Methanobrevibacter; __Methanobrevibacter_gottschalkii	k__Archaea; p__Euryarchaeota; c__Methanobacteria; o__Methanobacteriales; f__Methanobacteriaceae; g__Methanobrevibacter; s__
U55240	Methanobrevibacter wolinii strain SH	k__Archaea;p__Euryarchaeota;c__Methanobacteria;o__Methanobacteriales;f__Methanobacteriaceae;g__Methanobrevibacter;s__Methanobrevibacter wolinii;i__Methanobrevibacter wolinii SH	Archaea; __Euryarchaeota; __Methanobacteria; __Methanobacteriales; __Methanobacteriaceae; __Methanobrevibacter; __Methanobrevibacter_wolinii	k__Archaea; p__Euryarchaeota; c__Methanobacteria; o__Methanobacteriales; f__Methanobacteriaceae; g__Methanobrevibacter; s__
U62533	Methanobrevibacter curvatus strain RFM-2	k__Archaea;p__Euryarchaeota;c__Methanobacteria;o__Methanobacteriales;f__Methanobacteriaceae;g__Methanobrevibacter;s__Methanobrevibacter curvatus;i__Methanobrevibacter curvatus strain RFM-2	Archaea; __Euryarchaeota; __Methanobacteria; __Methanobacteriales; __Methanobacteriaceae; __Methanobrevibacter; __Methanobrevibacter_curvatus	k__Archaea; p__Euryarchaeota; c__Methanobacteria; o__Methanobacteriales; f__Methanobacteriaceae; g__Methanobrevibacter; s__
U82322	Methanobrevibacter filiformis strain RFM-3	k__Archaea;p__Euryarchaeota;c__Methanobacteria;o__Methanobacteriales;f__Methanobacteriaceae;g__Methanobrevibacter;s__Methanobrevibacter filiformis;i__Methanobrevibacter filiformis strain RFM-3	Archaea; __Euryarchaeota; __Methanobacteria; __Methanobacteriales; __Methanobacteriaceae; __Methanobrevibacter; __Methanobrevibacter_filiformis	k__Archaea; p__Euryarchaeota; c__Methanobacteria; o__Methanobacteriales; f__Methanobacteriaceae; g__Methanobrevibacter; s__arboriphilus
