# Supplementary material for: RIM-DB: a taxonomic framework for community structure analysis of methanogenic archaea from the rumen and other intestinal environments
Source: PeerJ. 2014 Aug 5;2:e494. doi: 10.7717/peerj.494 (PMC4137658; doi:10.7717/peerj.494)
Supplement: Table S4 — Sets of partial archaeal 16S rRNA gene sequences (V6–V8) amplified from rumen samples used in this study, together with their accession numbers. [file peerj-02-494-s006.xls]

## Sheet: Sheet1
Datasets used to test different databases.
Sets of partial archaeal 16S rRNA gene sequences (V6-V8) amplified from rumen samples used in this study, together with their accession numbers.
Sample series	Accession	Species	Number of animals	Sampling dates	Feed
ARC	ERP005201	Cow	38	2010-10-01	Pasture
ARS	ERP005199	Sheep	8	2010-12-01	Pasture
	ERP005199		8	2011-02-01	Pellets
	ERP005199		8	2011-04-01	Pasture
BRA	NCBI Sequence Read Archive project PRJNA239421, submission ID “Winter Brassica”	Sheep	10	2011-06-01	Pasture
CGP	ERP005200	Sheep	19	2010-06-01	Pasture
	ERP005200		18	2010-07-01	Pellets
DAG	MG-RAST IDs 4491446.3-4491449.3	Cow	15	2010-04-01	Pasture
	MG-RAST IDs 4491446.3-4491449.3		16	2010-09-01	Pasture
	MG-RAST IDs 4491446.3-4491449.3		16	2010-10-01	Pasture
EAR	ERP005194	Cow	25	2010-11-01	Pasture
	ERP005194		23	2011-03-01	Pasture
RAP	NCBI Sequence Read Archive project PRJNA239421, submission ID “Forage rape”	Sheep	18	2011-08-01	Pasture
VAC	ERP005198	Sheep	11	2012-05-01	Lucerne chaffage
	ERP005198		8	2012-07-01	Pasture
	ERP005198		11	2012-08-01	Lucerne chaffage
